# Supplementary material
Source: PubMed Central journal article supplement (PMC3607186)
Supplement: 97320630009281S1.pdf [file 97320630009281S1.pdf]

## Supplementary material:

**Table 1:** Enzyme Kinetics of  $\alpha$ - amylase from *S.aureus*

| Source of $\alpha$ - amylase                      | Enzyme activity mg/ml/min | Specific activity (mg/ml)/mg/min | $K_M$ mg/ml  |
|---------------------------------------------------|---------------------------|----------------------------------|--------------|
| <i>S.aureus</i> ATCC 12600 extracellular fraction | 0.0193±0.0015             | 0.032±0.0036                     | 11.57±0.409  |
| Pure recombinant $\alpha$ - amylase from PLAM -1  | 0.052±0.0036              | 0.0208±0.033                     | 10.633±0.737 |

\*Values are the mean± SD from three determinations

**Table 2:** Enzyme Kinetics comparison of  $\alpha$ - amylase from *S.aureus* with other Bacterial  $\alpha$ - amylases

| Organism                     | $K_m$               | $V_{max}$                  | $K_{cat}$          | Reference            |
|------------------------------|---------------------|----------------------------|--------------------|----------------------|
| <i>Bacillus subtilis</i>     | 2.68 (mg/ml)        | 1.773(U/ml)                | 0.601 mg/ml        | [8]                  |
| <i>Streptococcus bovis</i>   | 0.88(mg/ml)         | 2.650 (U/mg)               | 2.510 mg/ml        | [22]                 |
| <i>Staphylococcus aureus</i> | 11.57±0.409 (mg/ml) | 0.032±0.0036(mg/ml)/mg/min | 1.6517±0.055 mg/ml | In the present study |

\*Values are the mean± SD from three determinations
